# Supplementary material
Source: PubMed Central journal article supplement (PMC2732836)
Supplement: 0907840106_0907840106SI.pdf [file 0907840106_0907840106SI.pdf]

# Supporting Information

Natan et al. 10.1073/pnas.0907840106

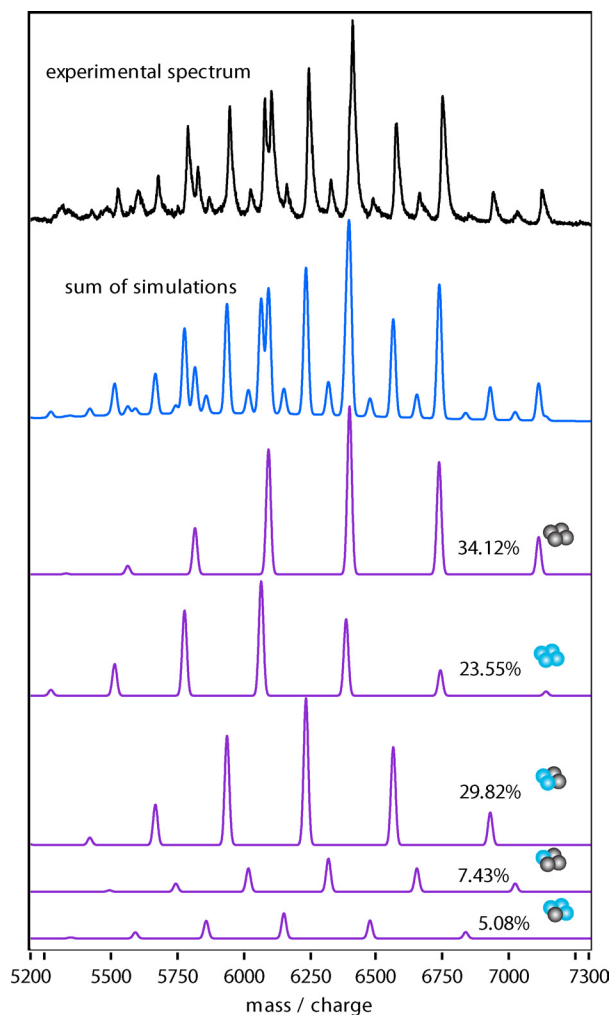

**Fig. S1.** Simulation of a selected mass spectrum (p53CT 37 °C after 5 h) the individual components are simulated separately (violet), so that the simulation (added component simulations plus simulated background, shown in blue) maximally resembles the measured mass spectrum (black).
